# Supplementary material for: Effect of continuous versus on-demand treatment of ankylosing spondylitis with diclofenac over 2 years on radiographic progression of the spine: results from a randomised multicentre trial (ENRADAS)
Source: HighWire-hosted journal article supplement (doi:10.1136/annrheumdis-2015-207897), 2015-08-04
Supplement: annrheumdis-2015-207897supp.pdf [file annrheumdis-2015-207897supp.pdf]

| <b>Patients with complete sets of radiographs</b>                            |                    |                           |                         |                                                          | <b>ITT population</b>                                    |
|------------------------------------------------------------------------------|--------------------|---------------------------|-------------------------|----------------------------------------------------------|----------------------------------------------------------|
|                                                                              | <b>n / n (ITT)</b> | <b>Baseline mean (SD)</b> | <b>Year 2 mean (SD)</b> | <b>Mean change adjusted for baseline status [95% CI]</b> | <b>Mean change adjusted for baseline status [95% CI]</b> |
| <b>Patients stratified according to number of syndesmophytes at baseline</b> |                    |                           |                         |                                                          |                                                          |
| Patients with no syndesmophytes                                              | 52 / 73            | 1.2 (1.8)                 | 1.6 (2.6)               | 0.43<br>[-0.2; 1.1]                                      | 0.43<br>[-0.2; 1.1]                                      |
| Patients with 1 to 4 syndesmophytes                                          | 36 / 47            | 9.0 (4.9)                 | 10.3 (6.2)              | 1.33<br>[0.6; 2.1]                                       | 1.33<br>[0.6; 2.1]                                       |
| Patients with >4 syndesmophytes                                              | 34 / 47            | 36.7 (14.1)               | 38.4 (14.7)             | 1.66<br>[0.9; 2.4]                                       | 1.53<br>[0.8; 2.3]                                       |
| p-value for differences between the groups                                   |                    | <0.001                    | <0.001                  | 0.04                                                     | 0.06                                                     |
| <b>Patients stratified according to CRP-positivity at baseline</b>           |                    |                           |                         |                                                          |                                                          |
| Patients with CRP ≤5mg/l                                                     | 53 / 72            | 9.7 (14.2)                | 10.4 (14.4)             | 0.70<br>[0.1; 1.3]                                       | 0.69<br>[0.1; 1.3]                                       |
| Patients with CRP >5mg/l                                                     | 69 / 95            | 16.7 (18.5)               | 18.0 (19.4)             | 1.30<br>[0.8; 1.9]                                       | 1.26<br>[0.7; 1.8]                                       |
| p-value for differences between both groups                                  |                    | 0.02                      | 0.015                   | 0.16                                                     | 0.18                                                     |
| <b>Patients stratified according to smoking status</b>                       |                    |                           |                         |                                                          |                                                          |
| Patients who are currently smoking                                           | 58 / 79            | 12.6 (16.2)               | 13.8 (17.5)             | 1.27<br>[0.7; 1.9]                                       | 1.20<br>[0.6; 1.8]                                       |
| Patients who never smoked/are former smokers                                 | 64 / 88            | 14.6 (17.9)               | 15.5 (18.1)             | 0.83<br>[0.3; 1.4]                                       | 0.83<br>[0.3; 1.4]                                       |
| p-value for differences between both groups                                  |                    | 0.45                      | 0.36                    | 0.29                                                     | 0.43                                                     |

Suppl. table S1: mSASSS at baseline and end of year 2 and baseline adjusted mean changes in the mSASSS for patients with complete sets of radiographs and patients of the intention-to-treat (ITT) population

CI: confidence interval; SD: standard deviation;
